# Supplementary material for: Paving the way to collaborative context-aware mobile applications: a case study on preventing worsening of allergy symptoms
Source: Springer Nature journal article supplement (doi:10.1007/s11042-021-10759-6), 2021-03-12
Supplement: 11042_2021_10759_MOESM1_ESM.pdf [file 11042_2021_10759_MOESM1_ESM.pdf]

**Paving the way to collaborative context-aware mobile applications: a case study on preventing worsening of allergy symptoms: Survey Results**

| Postal code | Age | Gender | How competent are you with new technologies? | Question 1. I think I would like to use this system frequently. | Question 2. I found the system unnecessarily complex. | Question 3. I thought the system was easy to use | Question 4. I think I would need the support of a technical person to be able to use this system | Question 5. I found the various functions in this system were well integrated | Question 6. I thought there was too much inconsistency in this system | Question 7. I would imagine that most people would learn to use this system very quickly | Question 8. I found the system very cumbersome to use. | Question 9. I felt very confident using the system | Question 10. I needed to learn a lot of things before I could get going with this system | SUS (all questions) | Factor 1 (1,2,3,5,6,7,8,9) | Factor 2 (4,10) |
|-------------|-----|--------|----------------------------------------------|-----------------------------------------------------------------|-------------------------------------------------------|--------------------------------------------------|--------------------------------------------------------------------------------------------------|-------------------------------------------------------------------------------|-----------------------------------------------------------------------|------------------------------------------------------------------------------------------|--------------------------------------------------------|----------------------------------------------------|------------------------------------------------------------------------------------------|---------------------|----------------------------|-----------------|
| 11010       | 35  | Male   | 5                                            | 4                                                               | 1                                                     | 3                                                | 1                                                                                                | 5                                                                             | 2                                                                     | 4                                                                                        | 1                                                      | 5                                                  | 1                                                                                        | 87,5                | 84,4                       | 100,0           |
| 06800       | 53  | Male   | 3                                            | 3                                                               | 2                                                     | 4                                                | 1                                                                                                | 4                                                                             | 1                                                                     | 5                                                                                        | 1                                                      | 3                                                  | 1                                                                                        | 82,5                | 78,1                       | 100,0           |
| 11500       | 43  | Fem.   | 5                                            | 5                                                               | 1                                                     | 5                                                | 1                                                                                                | 5                                                                             | 1                                                                     | 5                                                                                        | 1                                                      | 5                                                  | 1                                                                                        | 100,0               | 100,0                      | 100,0           |
| 11500       | 47  | Male   | 5                                            | 5                                                               | 1                                                     | 5                                                | 1                                                                                                | 5                                                                             | 1                                                                     | 5                                                                                        | 1                                                      | 5                                                  | 1                                                                                        | 100,0               | 100,0                      | 100,0           |
| 11004       | 23  | Male   | 5                                            | 5                                                               | 1                                                     | 5                                                | 1                                                                                                | 5                                                                             | 1                                                                     | 5                                                                                        | 1                                                      | 5                                                  | 1                                                                                        | 100,0               | 100,0                      | 100,0           |
| 11004       | 54  | Fem.   | 1                                            | 5                                                               | 1                                                     | 4                                                | 2                                                                                                | 5                                                                             | 1                                                                     | 4                                                                                        | 1                                                      | 5                                                  | 2                                                                                        | 90,0                | 93,8                       | 75,0            |
| 11100       | 27  | Male   | 5                                            | 5                                                               | 1                                                     | 5                                                | 1                                                                                                | 5                                                                             | 1                                                                     | 5                                                                                        | 1                                                      | 5                                                  | 1                                                                                        | 100,0               | 100,0                      | 100,0           |
| 11004       | 56  | Male   | 3                                            | 5                                                               | 1                                                     | 4                                                | 1                                                                                                | 5                                                                             | 1                                                                     | 4                                                                                        | 1                                                      | 5                                                  | 2                                                                                        | 92,5                | 93,8                       | 87,5            |
| 11004       | 68  | Fem.   | 4                                            | 5                                                               | 1                                                     | 5                                                | 1                                                                                                | 5                                                                             | 1                                                                     | 5                                                                                        | 1                                                      | 5                                                  | 1                                                                                        | 100,0               | 100,0                      | 100,0           |
| 37120       | 20  | Male   | 5                                            | 5                                                               | 1                                                     | 5                                                | 1                                                                                                | 5                                                                             | 1                                                                     | 5                                                                                        | 1                                                      | 5                                                  | 1                                                                                        | 100,0               | 100,0                      | 100,0           |
| 37120       | 25  | Fem.   | 4                                            | 5                                                               | 1                                                     | 5                                                | 1                                                                                                | 5                                                                             | 1                                                                     | 5                                                                                        | 1                                                      | 5                                                  | 1                                                                                        | 100,0               | 100,0                      | 100,0           |
| 11510       | 19  | Male   | 5                                            | 5                                                               | 1                                                     | 5                                                | 1                                                                                                | 5                                                                             | 1                                                                     | 5                                                                                        | 1                                                      | 5                                                  | 1                                                                                        | 100,0               | 100,0                      | 100,0           |
| 11007       | 46  | Fem.   | 2                                            | 5                                                               | 2                                                     | 4                                                | 1                                                                                                | 5                                                                             | 1                                                                     | 5                                                                                        | 1                                                      | 5                                                  | 2                                                                                        | 92,5                | 93,8                       | 87,5            |
| 11130       | 33  | Male   | 4                                            | 5                                                               | 1                                                     | 5                                                | 1                                                                                                | 5                                                                             | 1                                                                     | 5                                                                                        | 1                                                      | 5                                                  | 1                                                                                        | 100,0               | 100,0                      | 100,0           |
| 11405       | 62  | Fem.   | 1                                            | 5                                                               | 2                                                     | 4                                                | 1                                                                                                | 5                                                                             | 1                                                                     | 4                                                                                        | 1                                                      | 4                                                  | 2                                                                                        | 87,5                | 87,5                       | 87,5            |
| 11001       | 17  | Male   | 5                                            | 5                                                               | 1                                                     | 5                                                | 1                                                                                                | 5                                                                             | 1                                                                     | 5                                                                                        | 1                                                      | 5                                                  | 1                                                                                        | 100,0               | 100,0                      | 100,0           |
| 37001       | 21  | Male   | 5                                            | 5                                                               | 1                                                     | 5                                                | 1                                                                                                | 5                                                                             | 1                                                                     | 5                                                                                        | 1                                                      | 5                                                  | 1                                                                                        | 100,0               | 100,0                      | 100,0           |
| 23740       | 23  | Male   | 5                                            | 5                                                               | 1                                                     | 5                                                | 1                                                                                                | 5                                                                             | 1                                                                     | 5                                                                                        | 1                                                      | 5                                                  | 1                                                                                        | 100,0               | 100,0                      | 100,0           |
| 37005       | 20  | Fem.   | 5                                            | 5                                                               | 1                                                     | 5                                                | 1                                                                                                | 5                                                                             | 1                                                                     | 5                                                                                        | 1                                                      | 5                                                  | 1                                                                                        | 100,0               | 100,0                      | 100,0           |
| 41003       | 29  | Fem.   | 4                                            | 5                                                               | 1                                                     | 4                                                | 1                                                                                                | 5                                                                             | 1                                                                     | 5                                                                                        | 1                                                      | 5                                                  | 1                                                                                        | 97,5                | 96,9                       | 100,0           |
| 37120       | 59  | Fem.   | 4                                            | 5                                                               | 1                                                     | 4                                                | 1                                                                                                | 5                                                                             | 1                                                                     | 5                                                                                        | 1                                                      | 5                                                  | 1                                                                                        | 97,5                | 96,9                       | 100,0           |
| 11004       | 53  | Fem.   | 3                                            | 5                                                               | 2                                                     | 4                                                | 2                                                                                                | 5                                                                             | 1                                                                     | 5                                                                                        | 1                                                      | 5                                                  | 2                                                                                        | 90,0                | 93,8                       | 75,0            |
| 37184       | 21  | Male   | 5                                            | 5                                                               | 1                                                     | 5                                                | 1                                                                                                | 5                                                                             | 1                                                                     | 5                                                                                        | 1                                                      | 5                                                  | 1                                                                                        | 100,0               | 100,0                      | 100,0           |
| 11610       | 60  | Fem.   | 1                                            | 5                                                               | 3                                                     | 3                                                | 3                                                                                                | 4                                                                             | 2                                                                     | 3                                                                                        | 1                                                      | 4                                                  | 3                                                                                        | 67,5                | 71,9                       | 50,0            |
| 23740       | 22  | Male   | 5                                            | 5                                                               | 1                                                     | 5                                                | 1                                                                                                | 5                                                                             | 1                                                                     | 5                                                                                        | 1                                                      | 5                                                  | 1                                                                                        | 100,0               | 100,0                      | 100,0           |
| 11100       | 25  | Fem.   | 4                                            | 4                                                               | 1                                                     | 5                                                | 1                                                                                                | 5                                                                             | 1                                                                     | 5                                                                                        | 1                                                      | 5                                                  | 1                                                                                        | 97,5                | 96,9                       | 100,0           |
| 11005       | 42  | Fem.   | 4                                            | 5                                                               | 1                                                     | 5                                                | 1                                                                                                | 5                                                                             | 1                                                                     | 5                                                                                        | 1                                                      | 5                                                  | 1                                                                                        | 100,0               | 100,0                      | 100,0           |
| 37120       | 61  | Male   | 4                                            | 4                                                               | 1                                                     | 5                                                | 1                                                                                                | 5                                                                             | 1                                                                     | 5                                                                                        | 1                                                      | 5                                                  | 1                                                                                        | 97,5                | 96,9                       | 100,0           |
| 11003       | 24  | Fem.   | 5                                            | 5                                                               | 1                                                     | 5                                                | 1                                                                                                | 5                                                                             | 1                                                                     | 5                                                                                        | 1                                                      | 5                                                  | 1                                                                                        | 100,0               | 100,0                      | 100,0           |
| 11012       | 36  | Fem.   | 4                                            | 5                                                               | 1                                                     | 5                                                | 1                                                                                                | 5                                                                             | 1                                                                     | 5                                                                                        | 1                                                      | 5                                                  | 1                                                                                        | 100,0               | 100,0                      | 100,0           |

|       |    |      |   |   |   |   |   |   |   |   |   |   |   |       |       |       |
|-------|----|------|---|---|---|---|---|---|---|---|---|---|---|-------|-------|-------|
| 11610 | 65 | Male | 3 | 3 | 2 | 4 | 2 | 4 | 1 | 5 | 1 | 4 | 2 | 80,0  | 81,3  | 75,0  |
| 11130 | 30 | Fem. | 4 | 4 | 1 | 5 | 1 | 5 | 1 | 5 | 1 | 5 | 1 | 97,5  | 96,9  | 100,0 |
| 37006 | 24 | Fem. | 5 | 5 | 1 | 5 | 1 | 5 | 1 | 5 | 1 | 5 | 1 | 100,0 | 100,0 | 100,0 |
| 11404 | 21 | Fem. | 5 | 4 | 1 | 5 | 1 | 5 | 1 | 5 | 1 | 5 | 1 | 97,5  | 96,9  | 100,0 |
| 11004 | 19 | Fem. | 5 | 5 | 1 | 5 | 1 | 5 | 1 | 5 | 1 | 5 | 1 | 100,0 | 100,0 | 100,0 |
| 11002 | 20 | Male | 5 | 5 | 1 | 5 | 1 | 5 | 1 | 5 | 1 | 5 | 1 | 100,0 | 100,0 | 100,0 |
| 37007 | 23 | Male | 5 | 4 | 1 | 5 | 1 | 5 | 1 | 5 | 1 | 5 | 1 | 97,5  | 96,9  | 100,0 |
| 11100 | 28 | Male | 5 | 4 | 1 | 5 | 1 | 5 | 1 | 5 | 1 | 5 | 1 | 97,5  | 96,9  | 100,0 |
| 11004 | 42 | Fem. | 2 | 5 | 2 | 3 | 2 | 5 | 1 | 5 | 1 | 3 | 2 | 82,5  | 84,4  | 75,0  |
| 11005 | 46 | Male | 4 | 4 | 1 | 5 | 1 | 5 | 1 | 5 | 1 | 5 | 1 | 97,5  | 96,9  | 100,0 |
| 11510 | 52 | Male | 3 | 3 | 1 | 5 | 1 | 5 | 1 | 5 | 1 | 5 | 1 | 95,0  | 93,8  | 100,0 |
| 11004 | 17 | Male | 5 | 5 | 1 | 5 | 1 | 5 | 1 | 5 | 1 | 5 | 1 | 100,0 | 100,0 | 100,0 |

Mean 4,07 4,67 1,19 4,64 1,14 4,93 1,05 4,86 1 4,83 1,21

|                                          |         |
|------------------------------------------|---------|
| Participants (n)                         | 42      |
| Mean - SUS Index                         | 95,8    |
| Standard Deviation                       | 7,06    |
| 85% CI (Confidence Interval) Upper Limit | 97,4    |
| 85% CI (Confidence Interval) Lower Limit | 94,26   |
| Sauro & Lewis Grade                      | A to A+ |

| Two Factor | n  | Mean | Std Dev     | 85CILL      | 85CIUL      | Grade |
|------------|----|------|-------------|-------------|-------------|-------|
| SUS        | 42 | 95,8 | 7,063878112 | 94,26376205 | 97,40290461 | A+    |
| Usable     | 42 | 95,9 | 6,70905942  | 94,4170064  | 97,39846979 | A+    |
| Learnable  | 42 | 95,5 | 10,62865022 | 93,17406196 | 95,53571429 | A+    |

| Question 11.<br>When the allergy season strikes...                                                      | Question 12.<br>The most interesting features of AergiApp are:                                                                                                                         | Question 13.<br>For future improvements, you consider it critical...                                                                                                                                                                           |
|---------------------------------------------------------------------------------------------------------|----------------------------------------------------------------------------------------------------------------------------------------------------------------------------------------|------------------------------------------------------------------------------------------------------------------------------------------------------------------------------------------------------------------------------------------------|
| They always end up affecting me because I cannot predict them.                                          | Information about pollen levels.,<br>Alerts about increasing pollen concentrations in my area.,<br>Frequent symptoms alerts from users with the same allergies as me.                  | To include information about pollen from more cities.,<br>To include a section with graphs of the most reported symptoms, alerts received, pollen levels, etc.,<br>To add an option to filter alerts and symptoms based on different criteria. |
| I get information about pollen levels from other existent resources so I can act before they affect me. | Alerts about increasing pollen concentrations in my area.,<br>Information about each pollen type.,<br>Allowing me to keep track of my allergy outbreaks                                | To include information about pollen from more cities.,<br>To include a section with graphs of the most reported symptoms, alerts received, pollen levels, etc.,<br>Generation of reports about the reported symptoms.                          |
| They always end up affecting me because I cannot predict them.                                          | Alerts about increasing pollen concentrations in my area.,<br>Frequent symptoms alerts from users with the same allergies as me.,<br>Allowing me to keep track of my allergy outbreaks | To include information about pollen from more cities.,<br>To include a section with graphs of the most reported symptoms, alerts received, pollen levels, etc.,<br>To add an option to filter alerts and symptoms based on different criteria. |
| They always end up affecting me because I cannot predict them.                                          | Information about pollen levels.,<br>Alerts about increasing pollen concentrations in my area.,<br>Frequent symptoms alerts from users with the same allergies as me.                  | To include information about pollen from more cities.,<br>To include more types of pollen.,<br>To include a section with graphs of the most reported symptoms, alerts received, pollen levels, etc.                                            |
| They always end up affecting me because I cannot predict them.                                          | Information about pollen levels.,<br>Alerts about increasing pollen concentrations in my area.,<br>Frequent symptoms alerts from users with the same allergies as me.                  | To include information about pollen from more cities.,<br>To include a section with graphs of the most reported symptoms, alerts received, pollen levels, etc.,<br>Generation of reports about the reported symptoms.                          |
| They always end up affecting me because I cannot predict them.                                          | Information about pollen levels.,<br>Alerts about increasing pollen concentrations in my area.,<br>Frequent symptoms alerts from users with the same allergies as me.                  | To include more types of pollen.,<br>To include a section with graphs of the most reported symptoms, alerts received, pollen levels, etc.,<br>To include more symptoms and treatments.                                                         |
| They always end up affecting me because I cannot predict them.                                          | Information about pollen levels.,<br>Frequent symptoms alerts from users with the same allergies as me.,<br>Allowing me to keep track of my allergy outbreaks                          | To include information about pollen from more cities.,<br>To include a section with graphs of the most reported symptoms, alerts received, pollen levels, etc.,<br>To include more symptoms and treatments.                                    |
| They always end up affecting me because I cannot predict them.                                          | Information about pollen levels.,<br>Frequent symptoms alerts from users with the same allergies as me.,<br>Allowing me to keep track of my allergy outbreaks                          | To include information about pollen from more cities.,<br>To include more types of pollen.,<br>To include a section with graphs of the most reported symptoms, alerts received, pollen levels, etc.                                            |
| They always end up affecting me because I cannot predict them.                                          | Information about pollen levels.,<br>Frequent symptoms alerts from users with the same allergies as me.,<br>Information about each pollen type.                                        | To include more types of pollen.,<br>To include a section with graphs of the most reported symptoms, alerts received, pollen levels, etc.,<br>To include more symptoms and treatments.                                                         |
| They always end up affecting me because I cannot predict them.                                          | Information about pollen levels.,<br>Frequent symptoms alerts from users with the same allergies as me.,<br>Allowing me to keep track of my allergy outbreaks                          | To include information about pollen from more cities.,<br>To include a section with graphs of the most reported symptoms, alerts received, pollen levels, etc.,<br>Generation of reports about the reported symptoms.                          |

|                                                                                                         |                                                                                                                                                                       |                                                                                                                                                                                                                                                |
|---------------------------------------------------------------------------------------------------------|-----------------------------------------------------------------------------------------------------------------------------------------------------------------------|------------------------------------------------------------------------------------------------------------------------------------------------------------------------------------------------------------------------------------------------|
| I get information about pollen levels from other existent resources so I can act before they affect me. | Information about pollen levels.,<br>Alerts about increasing pollen concentrations in my area.,<br>Frequent symptoms alerts from users with the same allergies as me. | To include information about pollen from more cities.,<br>To include a section with graphs of the most reported symptoms, alerts received, pollen levels, etc.,<br>Generation of reports about the reported symptoms.                          |
| They always end up affecting me because I cannot predict them.                                          | Information about pollen levels.,<br>Alerts about increasing pollen concentrations in my area.,<br>Frequent symptoms alerts from users with the same allergies as me. | To include information about pollen from more cities.,<br>To include a section with graphs of the most reported symptoms, alerts received, pollen levels, etc.,<br>To add an option to filter alerts and symptoms based on different criteria. |
| They always end up affecting me because I cannot predict them.                                          | Information about pollen levels.,<br>Alerts about increasing pollen concentrations in my area.,<br>Frequent symptoms alerts from users with the same allergies as me. | To include information about pollen from more cities.,<br>To include a section with graphs of the most reported symptoms, alerts received, pollen levels, etc.,<br>Generation of reports about the reported symptoms.                          |
| They always end up affecting me because I cannot predict them.                                          | Information about pollen levels.,<br>Frequent symptoms alerts from users with the same allergies as me.,<br>Information about each pollen type.                       | To include information about pollen from more cities.,<br>Generation of reports about the reported symptoms.,<br>To add an option to filter alerts and symptoms based on different criteria.                                                   |
| They always end up affecting me because I cannot predict them.                                          | Information about pollen levels.,<br>Alerts about increasing pollen concentrations in my area.,<br>Frequent symptoms alerts from users with the same allergies as me. | To include information about pollen from more cities.,<br>To include more symptoms and treatments.,<br>Generation of reports about the reported symptoms.                                                                                      |
| They always end up affecting me because I cannot predict them.                                          | Information about pollen levels.,<br>Alerts about increasing pollen concentrations in my area.,<br>Frequent symptoms alerts from users with the same allergies as me. | To include information about pollen from more cities.,<br>Generation of reports about the reported symptoms.,<br>To add an option to filter alerts and symptoms based on different criteria.                                                   |
| They always end up affecting me because I cannot predict them.                                          | Information about pollen levels.,<br>Frequent symptoms alerts from users with the same allergies as me.,<br>Allowing me to keep track of my allergy outbreaks         | To include information about pollen from more cities.,<br>To include a section with graphs of the most reported symptoms, alerts received, pollen levels, etc.,<br>Generation of reports about the reported symptoms.                          |
| They always end up affecting me because I cannot predict them.                                          | Information about pollen levels.,<br>Alerts about increasing pollen concentrations in my area.,<br>Frequent symptoms alerts from users with the same allergies as me. | To include information about pollen from more cities.,<br>To include a section with graphs of the most reported symptoms, alerts received, pollen levels, etc.,<br>Generation of reports about the reported symptoms.                          |
| They always end up affecting me because I cannot predict them.                                          | Information about pollen levels.,<br>Alerts about increasing pollen concentrations in my area.,<br>Frequent symptoms alerts from users with the same allergies as me. | To include information about pollen from more cities.,<br>To include a section with graphs of the most reported symptoms, alerts received, pollen levels, etc.,<br>Generation of reports about the reported symptoms.                          |
| They always end up affecting me because I cannot predict them.                                          | Information about pollen levels.,<br>Frequent symptoms alerts from users with the same allergies as me.,<br>Allowing me to keep track of my allergy outbreaks         | To include information about pollen from more cities.,<br>To include a section with graphs of the most reported symptoms, alerts received, pollen levels, etc.,<br>To include more symptoms and treatments.                                    |
| They always end up affecting me because I cannot predict them.                                          | Information about pollen levels.,<br>Alerts about increasing pollen concentrations in my area.,<br>Frequent symptoms alerts from users with the same allergies as me. | To include information about pollen from more cities.,<br>To include a section with graphs of the most reported symptoms, alerts received, pollen levels, etc.,<br>Generation of reports about the reported symptoms.                          |

|                                                                                                         |                                                                                                                                                                       |                                                                                                                                                                                                                       |
|---------------------------------------------------------------------------------------------------------|-----------------------------------------------------------------------------------------------------------------------------------------------------------------------|-----------------------------------------------------------------------------------------------------------------------------------------------------------------------------------------------------------------------|
| I get information about pollen levels from other existent resources so I can act before they affect me. | Information about pollen levels.,<br>Alerts about increasing pollen concentrations in my area.,<br>Frequent symptoms alerts from users with the same allergies as me. | To include information about pollen from more cities.,<br>To include a section with graphs of the most reported symptoms, alerts received, pollen levels, etc.,<br>Generation of reports about the reported symptoms. |
| They always end up affecting me because I cannot predict them.                                          | Information about pollen levels.,<br>Alerts about increasing pollen concentrations in my area.,<br>Frequent symptoms alerts from users with the same allergies as me. | To include information about pollen from more cities.,<br>To include a section with graphs of the most reported symptoms, alerts received, pollen levels, etc.,<br>To include more symptoms and treatments.           |
| They always end up affecting me because I cannot predict them.                                          | Information about pollen levels.,<br>Frequent symptoms alerts from users with the same allergies as me.,<br>Information about each pollen type.                       | To include information about pollen from more cities.,<br>To include more types of pollen.,<br>To include more symptoms and treatments.                                                                               |
| They always end up affecting me because I cannot predict them.                                          | Information about pollen levels.,<br>Alerts about increasing pollen concentrations in my area.,<br>Frequent symptoms alerts from users with the same allergies as me. | To include information about pollen from more cities.,<br>To include a section with graphs of the most reported symptoms, alerts received, pollen levels, etc.,<br>To include more symptoms and treatments.           |
| They always end up affecting me because I cannot predict them.                                          | Information about pollen levels.,<br>Alerts about increasing pollen concentrations in my area.,<br>Frequent symptoms alerts from users with the same allergies as me. | To include information about pollen from more cities.,<br>To include a section with graphs of the most reported symptoms, alerts received, pollen levels, etc.,<br>To include more symptoms and treatments.           |
| They always end up affecting me because I cannot predict them.                                          | Information about pollen levels.,<br>Alerts about increasing pollen concentrations in my area.,<br>Frequent symptoms alerts from users with the same allergies as me. | To include information about pollen from more cities.,<br>To include more symptoms and treatments.,<br>Generation of reports about the reported symptoms.                                                             |
| They always end up affecting me because I cannot predict them.                                          | Information about pollen levels.,<br>Alerts about increasing pollen concentrations in my area.,<br>Frequent symptoms alerts from users with the same allergies as me. | To include information about pollen from more cities.,<br>To include a section with graphs of the most reported symptoms, alerts received, pollen levels, etc.,<br>Generation of reports about the reported symptoms. |
| I get information about pollen levels from other existent resources so I can act before they affect me. | Information about pollen levels.,<br>Alerts about increasing pollen concentrations in my area.,<br>Frequent symptoms alerts from users with the same allergies as me. | To include information about pollen from more cities.,<br>To include a section with graphs of the most reported symptoms, alerts received, pollen levels, etc.,<br>To include more symptoms and treatments.           |
| They always end up affecting me because I cannot predict them.                                          | Information about pollen levels.,<br>Frequent symptoms alerts from users with the same allergies as me.,<br>Allowing me to keep track of my allergy outbreaks         | To include information about pollen from more cities.,<br>To include a section with graphs of the most reported symptoms, alerts received, pollen levels, etc.,<br>To include more symptoms and treatments.           |
| They always end up affecting me because I cannot predict them.                                          | Information about pollen levels.,<br>Information about each pollen type.,<br>Allowing me to keep track of my allergy outbreaks                                        | To include information about pollen from more cities.,<br>To include a section with graphs of the most reported symptoms, alerts received, pollen levels, etc.,<br>To include more symptoms and treatments.           |
| They always end up affecting me because I cannot predict them.                                          | Information about pollen levels.,<br>Alerts about increasing pollen concentrations in my area.,<br>Frequent symptoms alerts from users with the same allergies as me. | To include information about pollen from more cities.,<br>To include a section with graphs of the most reported symptoms, alerts received, pollen levels, etc.,<br>Generation of reports about the reported symptoms. |

|                                                                                                         |                                                                                                                                                                       |                                                                                                                                                                                                                       |
|---------------------------------------------------------------------------------------------------------|-----------------------------------------------------------------------------------------------------------------------------------------------------------------------|-----------------------------------------------------------------------------------------------------------------------------------------------------------------------------------------------------------------------|
| They always end up affecting me because I cannot predict them.                                          | Information about pollen levels.,<br>Alerts about increasing pollen concentrations in my area.,<br>Frequent symptoms alerts from users with the same allergies as me. | To include information about pollen from more cities.,<br>To include a section with graphs of the most reported symptoms, alerts received, pollen levels, etc.,<br>Generation of reports about the reported symptoms. |
| They always end up affecting me because I cannot predict them.                                          | Information about pollen levels.,<br>Alerts about increasing pollen concentrations in my area.,<br>Frequent symptoms alerts from users with the same allergies as me. | To include information about pollen from more cities.,<br>To include a section with graphs of the most reported symptoms, alerts received, pollen levels, etc.,<br>Generation of reports about the reported symptoms. |
| I get information about pollen levels from other existent resources so I can act before they affect me. | Information about pollen levels.,<br>Frequent symptoms alerts from users with the same allergies as me.,<br>Allowing me to keep track of my allergy outbreaks         | To include information about pollen from more cities.,<br>To include a section with graphs of the most reported symptoms, alerts received, pollen levels, etc.,<br>To include more symptoms and treatments.           |
| They always end up affecting me because I cannot predict them.                                          | Information about pollen levels.,<br>Alerts about increasing pollen concentrations in my area.,<br>Frequent symptoms alerts from users with the same allergies as me. | To include information about pollen from more cities.,<br>To include a section with graphs of the most reported symptoms, alerts received, pollen levels, etc.,<br>Generation of reports about the reported symptoms. |
| They always end up affecting me because I cannot predict them.                                          | Information about pollen levels.,<br>Alerts about increasing pollen concentrations in my area.,<br>Frequent symptoms alerts from users with the same allergies as me. | To include information about pollen from more cities.,<br>To include a section with graphs of the most reported symptoms, alerts received, pollen levels, etc.,<br>Generation of reports about the reported symptoms. |
| They always end up affecting me because I cannot predict them.                                          | Information about pollen levels.,<br>Frequent symptoms alerts from users with the same allergies as me.,<br>Allowing me to keep track of my allergy outbreaks         | To include information about pollen from more cities.,<br>To include more symptoms and treatments.,<br>Generation of reports about the reported symptoms.                                                             |
| They always end up affecting me because I cannot predict them.                                          | Information about pollen levels.,<br>Alerts about increasing pollen concentrations in my area.,<br>Allowing me to keep track of my allergy outbreaks                  | To include information about pollen from more cities.,<br>To include a section with graphs of the most reported symptoms, alerts received, pollen levels, etc.,<br>Generation of reports about the reported symptoms. |
| They always end up affecting me because I cannot predict them.                                          | Information about pollen levels.,<br>Alerts about increasing pollen concentrations in my area.,<br>Frequent symptoms alerts from users with the same allergies as me. | To include information about pollen from more cities.,<br>To include a section with graphs of the most reported symptoms, alerts received, pollen levels, etc.,<br>Generation of reports about the reported symptoms. |
| They always end up affecting me because I cannot predict them.                                          | Information about pollen levels.,<br>Frequent symptoms alerts from users with the same allergies as me.,<br>Allowing me to keep track of my allergy outbreaks         | To include information about pollen from more cities.,<br>Generation of reports about the reported symptoms.,<br>To add an option to filter alerts and symptoms based on different criteria.                          |
| They always end up affecting me because I cannot predict them.                                          | Information about pollen levels.,<br>Alerts about increasing pollen concentrations in my area.,<br>Frequent symptoms alerts from users with the same allergies as me. | To include information about pollen from more cities.,<br>To include a section with graphs of the most reported symptoms, alerts received, pollen levels, etc.,<br>Generation of reports about the reported symptoms. |



|   |   |   |   |
|---|---|---|---|
| 4 | 5 | 5 | 5 |
| 5 | 5 | 5 | 5 |
| 5 | 5 | 5 | 5 |
| 5 | 5 | 5 | 5 |
| 5 | 5 | 5 | 5 |
| 5 | 5 | 5 | 5 |
| 5 | 5 | 5 | 5 |
| 5 | 5 | 5 | 5 |

|                                                 |      |      |      |      |
|-------------------------------------------------|------|------|------|------|
| <b>Mean</b>                                     | 4,83 | 4,95 | 4,88 | 4,88 |
| <b>Standard Deviation</b>                       | 0,44 | 0,31 | 0,4  | 0,45 |
| <b>85% CI (Confidence Interval) Upper Limit</b> | 4,83 | 4,95 | 4,88 | 4,88 |
| <b>85% CI (Confidence Interval) Lower Limit</b> | 4,83 | 4,95 | 4,88 | 4,88 |
